# Supplementary material
Source: PubMed Central journal article supplement (PMC3411979)
Supplement: 1209759109_pnas.201209759SI.pdf [file 1209759109_pnas.201209759SI.pdf]

# Supporting Information

Teichert et al. 10.1073/pnas.1209759109

## SI Materials and Methods

Experiments were conducted with an observation solution (also called “bath solution”) that consisted of 145 mM NaCl, 5 mM KCl, 2 mM CaCl<sub>2</sub>, 1 mM MgCl<sub>2</sub>, 1 mM sodium citrate, 10 mM Hepes, and 10 mM glucose, pH 7.4. Working concentrations of pharmacological agents (i.e., challenge compounds; see Table S1) were made by diluting concentrated stock solutions in observation solution. Stock solutions were as follows: 10.2 M allyl isothiocyanate (AITC) oil (Sigma-Aldrich); 1 mM ATP disodium salt trihydrate (Sigma-Aldrich) in observation solution; 10 μM α-Dendrotoxin (α-Dtx) (Alomone Labs) in observation solution; 10 μM κM-conopeptide RIIIJ (κM-RIIIJ) in observation solution; 640 mM (100 mg/mL) (1R, 2S, 5R)-(-)-menthol (Sigma-Aldrich) in ethanol; 100 μM μO-conopeptide MrVIB (μO-MrVIB) in observation solution + 0.1 mg/mL BSA and 0.01% DMSO; 2 mM nifedipine hydrochloride (Sigma-Aldrich) in DMSO; 10 μM SNX-482 (Peptides International) in observation solution + 0.1 mg/mL BSA; 1 mM TTX in distilled water; 30 mM veratridine in DMSO; 50 μM ω-conopeptide GVIA, and ω-conopeptide MVIIC (ω-MVIIC) in observation solution + 0.2 mg/mL BSA. Elevated extracellular potassium concentrations were achieved by reducing the concentration of NaCl in the observation solution by the corresponding increase in concentration of KCl, to keep osmolarity constant.

All experimental trials began with an ~15-s application of a high concentration of extracellular KCl ([K<sup>+</sup>]<sub>o</sub>) to depolarize the neurons. Nonneuronal cells and nonviable neurons that did not respond to high [K<sup>+</sup>]<sub>o</sub> were excluded from further analysis. In all figures, arrows indicate the ~15-s application of high [K<sup>+</sup>]<sub>o</sub> or other challenge compounds described below (or bath solution); after each application the free compound or high [K<sup>+</sup>]<sub>o</sub> was washed out of the well with room-temperature bath solution. As shown in the figures, each experimental trial included at least one replacement of bath solution with identical bath solution at room temperature, which served as a negative control to ensure that an increase in the cytoplasmic calcium concentration ([Ca<sup>2+</sup>]<sub>i</sub>) was not elicited merely by exchanging solutions. In addition to the application of high [K<sup>+</sup>]<sub>o</sub> to depolarize neurons, changes in [Ca<sup>2+</sup>]<sub>i</sub>

were elicited by two types of experimental protocols: receptor-agonist challenges (RA challenges) and membrane-potential challenges (MP challenges).

An RA-challenge compound elicits an increase in [Ca<sup>2+</sup>]<sub>i</sub> through activation of a calcium-permeable ionotropic receptor or through activation of a metabotropic receptor (G protein-coupled receptor, GPCR) that stimulates release of calcium from the endoplasmic reticulum. We also used physiological challenges, i.e., cold bath solutions, which were a type of RA challenge, because cold temperature is the natural agonist of TRPM8 channels (also activated by menthol). Except when cold bath solution was applied, as indicated in the figures, experiments were conducted at room temperature (~24 °C).

An MP-challenge compound alters [Ca<sup>2+</sup>]<sub>i</sub> by changing membrane potential through agonist or antagonist activity on particular voltage-gated ion channels. MP-challenge compounds were used in combination with various depolarizing stimuli, such as high [K<sup>+</sup>]<sub>o</sub> or RA challenges, to determine whether the MP-challenge compounds amplified or blocked the [Ca<sup>2+</sup>]<sub>i</sub> signal elicited by such depolarizing stimuli. MP-challenge compounds were allowed to equilibrate with their molecular targets over time, as indicated by horizontal bars in the figures, typically between applications of identical depolarizing stimuli. In all figures, horizontal bars indicate the duration of time (>15 s) that a compound (or cold bath solution) was present in the well.

In the presence of an MP-challenge compound, the change in [Ca<sup>2+</sup>]<sub>i</sub> elicited by a depolarizing stimulus was evaluated in terms of peak height, which is a measurement from the [Ca<sup>2+</sup>]<sub>i</sub> baseline (i.e., relative resting [Ca<sup>2+</sup>]<sub>i</sub>) to the top of the elicited peak (i.e., relative maximal [Ca<sup>2+</sup>]<sub>i</sub> achieved by the depolarizing stimulus). For each cell (i.e., trace), the peak height after application of MP-challenge compounds was compared with the average peak height of controls obtained before application of MP-challenge compounds. The result for each cell then was expressed as a percent response (i.e., percent of the control value). The results from each experimental trial were averaged to obtain a sample mean for M+A- and M+A+ neurons. Experimental trials were replicated to obtain an average percent response ± SEM.

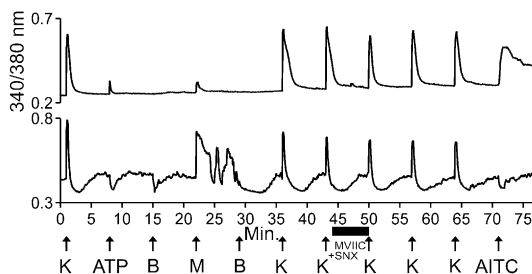

**Fig. S1.** The combination of an N- and P/Q-type Ca-channel blocker (ω-MVIIC) with an R-type Ca-channel blocker (SNX-482) did not inhibit the KCl-elicited calcium signal in M+A- neurons (Lower) but attenuated the signal in M+A+ neurons (Upper). The experimental protocol shown in Fig. 2 was used to obtain these traces, with the exception of the compounds used to block the KCl-elicited calcium signals. (Upper) The KCl-elicited calcium signal in this M+A+ neuron was attenuated modestly by the combination of ω-MVIIC and SNX-482. (Lower) The KCl-elicited calcium signal in this M+A- neuron was not blocked by the combination of ω-MVIIC and SNX-482.





**Table S1. Abbreviations of compound names and controls, with the working concentrations of compounds used in all figures (except as otherwise indicated in figure legends)**

| Compound                                          | Abbreviation | Working concentration | Function               | Molecular target                                               |
|---------------------------------------------------|--------------|-----------------------|------------------------|----------------------------------------------------------------|
| <b>RA-challenge compounds</b>                     |              |                       |                        |                                                                |
| Allyl Isothiocyanate (mustard oil)                | AITC         | 100 $\mu$ M           | Agonist                | TRPA1 channel                                                  |
| ATP                                               | ATP          | 10–20 $\mu$ M         | Agonist                | P2X or P2Y receptors                                           |
| Menthol                                           | M            | 250–500 $\mu$ M       | Agonist                | TRPM8 channel                                                  |
| <b>MP-challenge compounds</b>                     |              |                       |                        |                                                                |
| <b>K channels*</b>                                |              |                       |                        |                                                                |
| $\alpha$ -Dendrotoxin                             | Dtx          | 200 nM                | Antagonist             | K <sub>V</sub> 1.1, 1.2, 1.6                                   |
| $\kappa$ M-Conopeptide RIIIJ                      | RIIIJ        | 1 $\mu$ M             | Antagonist             | K <sub>V</sub> 1.2                                             |
| <b>Ca channels</b>                                |              |                       |                        |                                                                |
| $\omega$ -Conopeptide GVIA                        | GVIA         | 1 $\mu$ M             | Antagonist             | Ca <sub>v</sub> 2.2 (N-type)                                   |
| $\omega$ -Conopeptide MVIIIC                      | MVIIIC       | 10 $\mu$ M            | Antagonist             | Ca <sub>v</sub> 2.1 (P/Q-type)<br>Ca <sub>v</sub> 2.2 (N-type) |
| Nicardipine                                       | Nic          | 4 $\mu$ M             | Antagonist             | Ca <sub>v</sub> 1 (L-type)                                     |
| SNX-482                                           | SNX          | 300 nM                | Antagonist             | Ca <sub>v</sub> 2.3 (R-type)                                   |
| <b>Na channels</b>                                |              |                       |                        |                                                                |
| Tetrodotoxin (TTX)                                | T            | 1 $\mu$ M             | Antagonist             | TTX-S Na channels                                              |
| Tetrodotoxin (TTX) +<br>$\mu$ O-Conopeptide MrVIB | T+Mr         | 1 $\mu$ M             | Antagonist             | TTX-S Na channels +<br>Na <sub>v</sub> 1.8 (TTX-R)             |
| Veratridine                                       | V            | 30 $\mu$ M            | Agonist                | Na channels                                                    |
| <b>Controls</b>                                   |              |                       |                        |                                                                |
| KCl                                               | K            | 25 mM                 | + Control (depolarize) | Ca channels                                                    |
| Bath replacement at room temperature, ~24 °C      | B            | NA                    | – Control              | None                                                           |

Some of the abbreviations in the table, which are used in all figures, are shortened more than the abbreviations used in the text, because of space constraints in the figures. NA, not applicable.

\*Properties of the large and functionally diverse voltage-gated K channel family have been reviewed comprehensively (1, 2).

1. Gutman GA, et al.; International Union of Pharmacology (2003) International Union of Pharmacology. XLI. Compendium of voltage-gated ion channels: Potassium channels. *Pharmacol Rev* 55:583–586.
2. Gutman GA, et al. (2005) International Union of Pharmacology. LIII. Nomenclature and molecular relationships of voltage-gated potassium channels. *Pharmacol Rev* 57:473–508.
